# Supplementary material
Source: publisher figshare collection journal article supplement (https://frontiersin.figshare.com/ndownloader/files/22063557)
Supplement: Supplementary file 1 [file 22063557]

Supplementary Table S2. Linear regression statistics: The relationship between community productivity (mg DW d<sup>-1</sup>) and community traits; Median Maximum Root Length (MMRL, mm), root length range (cm), Specific Root Length (SRL), leaf tissue N concentration (%DW) and leaf tissue  $\delta^{15}\text{N}$ .

|                                                      | Coefficient | Intercept | Regression statistics |          |          |          |
|------------------------------------------------------|-------------|-----------|-----------------------|----------|----------|----------|
|                                                      |             |           | <i>r</i> <sup>2</sup> | <i>n</i> | <i>F</i> | <i>P</i> |
| <b>Community productivity (mg DW d<sup>-1</sup>)</b> |             |           |                       |          |          |          |
| Community MMRL (mm)                                  | 4.706       | 9.314     | 0.1021                | 13       | 1.364    | 0.2655   |
| Root length range (mm)                               | -2.676      | 58.093    | 0.1024                | 13       | 1.369    | 0.2648   |
| Community SRL                                        | 1.076       | 24.495    | 0.0118                | 11       | 0.119    | 0.7371   |
| Community N (%DW)                                    | 11.812      | -2.764    | 0.1375                | 14       | 2.073    | 0.1736   |
| Community δ <sup>15</sup> N                          | -9.8        | 70.207    | 0.1778                | 13       | 1.602    | 0.2297   |
